## Reliable detection of pyrazinamide antitubercular activity *in vitro*.

Alexandre Gouzy\*, Claire Healy<sup>1</sup>, Dirk Schnappinger & Sabine Ehrt\*

Department of Microbiology and Immunology, Weill Cornell Medical College, New York, NY 10065, USA.

\* To whom correspondence may be addressed:

Dr Alexandre Gouzy, Ph.D.

Address: 413 East 69<sup>th</sup> Street, Room BB1102. New York, NY, 10021

Telephone: 646-962-6219

E-mail: [alg2053@med.cornell.edu](mailto:alg2053@med.cornell.edu)

Professor Sabine Ehrt, Ph.D.

Address: 413 East 69<sup>th</sup> Street, Room BB1102. New York, NY, 10021

Telephone: 646-962-6215

E-mail: [sae2004@med.cornell.edu](mailto:sae2004@med.cornell.edu)

<sup>1</sup> Present address: School of Medicine, Trinity College Dublin, Dublin 2, Ireland.

**Author Contributions:** A.G, C.H, D. S and S.E designed research; A.G performed research; A.G, C.H, D.S and S.E analyzed data; A.G, D.S and S.E wrote the paper.

**Competing Interest Statement:** The authors declare no conflict of interest.

**Classification:** Biological Sciences / Microbiology

**Keywords:** Pyrazinamide/ Mycobacterium tuberculosis / Lipids / acidic pH / drug resistance

### 1 Abstract

2

3

Pyrazinamide (PZA) is a pivotal antibiotic for the chemotherapy of tuberculosis (TB), a disease caused by the bacterium *Mycobacterium tuberculosis* (Mtb). PZA is notorious for its poor *in vitro* activity which complicates phenotypic PZA-susceptibility testing (PPST) and likely causes inappropriate treatment of TB patients. Here, we show that PZA activity can be reliably detected using an acidic and lipid-rich culture medium mimicking conditions Mtb encounters during an infection. Our growth model could facilitate PPST to improve the treatment of TB patients and ameliorate the global surveillance of PZA resistance.

9

10

11

### 11 Introduction

12

13

Tuberculosis (TB) is caused by *Mycobacterium tuberculosis* (Mtb) and is the deadliest human disease due to a single bacterium (WHO, Global TB report, 2020). The rise of drug resistance is a major public health concern for the treatment of infectious diseases such as TB [1]. Pyrazinamide (PZA) is a pivotal first-line anti-TB drug that allowed the shortening of TB treatment from 9 to 6 months [2]. PZA resistance is estimated to affect 3 to 42.1% of TB cases and is mainly due to mutations in the promoter or the open reading frame of the gene *pncA* (80-90%) coding for the enzyme PncA [3], [4]. PncA converts PZA into its active form, pyrazinoic acid (POA). The mechanism(s) of action of PZA and POA are still not fully elucidated [5]. DNA sequencing of the *pncA* region is currently the most reliable method for the detection of PZA resistance [6] but the technology required for such tests is not universally available in area of the world where TB is prevalent. Moreover, the absence of a “hot spot region” comprising most mutations in the *pncA*

23

24 region complicates the development of a diagnostic assay [4]. Therefore, the World Health  
25 Organization considers phenotypic PZA-susceptibility testing (PPST) the gold standard for the  
26 detection of PZA-resistant TB. Despite its excellent efficacy *in vivo*, PZA is notorious for its poor  
27 activity against Mtb in standard media making PPST technically challenging. PZA activity increases  
28 in acidic media and commercial PZA testing kits use media buffered to pH5.9 to detect PZA  
29 resistance. The reliability of PPST in the clinic is reduced by the high frequency of false positive  
30 results caused by large inoculum sizes increasing the pH of the media to a pH at which PZA is not  
31 active [7]. Moreover, growth of Mtb is inhibited at pH<5.8 in standard media containing glycerol  
32 (Gly) and glucose as main carbon sources, which prevents the use of media at pH lower than 5.9  
33 [8]. Consequently, PPST is not routinely conducted in the clinic which prevents optimal treatment  
34 of patients infected with PZA-resistant Mtb [9]. We have recently shown that Mtb can readily grow  
35 in acidic media (pH<5.8) if host-relevant lipids such as oleic acid (OA) are provided as the primary  
36 carbon source [8]. Here, we demonstrate that an acidic and lipid-rich culture medium allows to  
37 accurately measure the minimal inhibitory concentration (MIC) of PZA to detect PZA resistance.

38

## 39 Results and discussion

40

41 To quantify PZA activity *in vitro*, wild-type Mtb was grown in 7H9 media containing Gly or OA as a  
42 main carbon source at either neutral (pH7) or acidic pH (pH5) (Fig 1 A). 100 µg/mL PZA did not  
43 affect growth of Mtb at pH7 and as previously described, Mtb did not grow with Gly at pH5  
44 independently of the presence of PZA [8]. In contrast, 100 µg/mL PZA completely inhibited the  
45 growth of Mtb with OA at pH5. Moreover, PZA drastically reduced Mtb CFUs at pH5 in the presence  
46 of OA (>6 log<sub>10</sub>) but only had a minor impact with Gly (≈1 log<sub>10</sub>) at pH5. Furthermore, by growing  
47 Mtb with OA at various pH, we demonstrated that decreasing the pH increases Mtb growth inhibition  
48 and killing by PZA (Fig. 1 B and C). In these experiments, growth with OA depended on OA  
49 replenishment, which was needed to avoid the toxic effect OA exerts on Mtb at high concentrations.  
50 While this OA replenishment method stimulates growth of Mtb, it limits throughput. Early studies by  
51 René Dubos have shown that bovine serum albumin (BSA) binds to OA and protects Mtb from OA  
52 toxicity [10]. To incorporate more OA in our media without causing Mtb growth inhibition, we  
53 increased the amount of BSA usually present in the media (50g/L instead of 5g/L). In this BSA-  
54 enriched medium, Mtb grew with up to 7 mM OA at pH7 and 4 mM at pH5 (Fig. 1 D). The increased  
55 OA toxicity observed at acidic pH is likely due to the reduced binding of OA to BSA leading to higher  
56 amounts of free toxic OA [11]. Using BSA-enriched media containing 3 mM OA, we determined the  
57 MIC of PZA at various pH (Fig. 1 E). Bacterial growth was inhibited by less than 25% at ≥pH 6.5  
58 and less than 65% at pH6.25 with the highest concentration of PZA tested. In comparison, PZA  
59 fully inhibited Mtb growth at pH6 and lower (MIC<sub>90</sub>pH6= 534 µg/mL; MIC<sub>90</sub>pH5.75= 594 µg/mL;  
60 MIC<sub>90</sub>pH5.5= 392 µg/mL; MIC<sub>90</sub>pH5.25= 137 µg/mL; MIC<sub>90</sub>pH5= 79 µg/mL). The MIC<sub>90</sub> of PZA  
61 measured in our growth model are similar to those reported in previous studies [12], [13]. Moreover,  
62 we confirmed that PZA activity is increased at acidic pH as described in early *in vitro* studies and  
63 more recently in the macrophage model of infection [12], [14]. As a proof of concept for PPST, we  
64 tested the resistance to PZA of an Mtb strain lacking *pncA*. Using OA replenishment at pH5, we  
65 first showed that growth and survival of the Δ*pncA* strain were not much affected by 500 µg/ml PZA  
66 (Fig. 2 A and B). Using a BSA-enriched medium at pH5.5 containing 3 mM OA, we reliably detected  
67 high-level resistance of the Δ*pncA* mutant to PZA in comparison to its WT and the complemented  
68 mutant (Fig. 2 C). In accordance with the role of PncA in converting PZA into POA, the Δ*pncA*  
69 mutant strain was as sensitive as WT to POA (Fig. 2 C). The detection of PZA resistance was  
70 shown to improve patient outcome [9]. Thus, the culture medium developed here could help  
71 implement PPST routinely in the clinic and ameliorate patient care. As PZA is currently considered  
72 to be part of a novel anti-TB regimen, an improvement of PPST might be beneficial for TB treatment  
73 now and in the future [15].

74

75

76

77

## 78 **Materials and Methods**

79

80 The wild-type Mtb strain used was H37Rv. In Fig. 2 parental H37Rv wild-type and  $\Delta pncA$  mutant  
81 strains were used along with the  $\Delta pncA$  mutant complemented by chromosomal (*attL5*) expression  
82 of *pncA* under the control of its native promoter. Prior to growth experiments, bacteria were grown  
83 in liquid culture in complete Middlebrook 7H9 medium supplemented with 0.2% glycerol, 0.05%  
84 tyloxapol, and ADN (5 g/L BSA, 0.2% dextrose and 0.085% NaCl). Before growth experiments,  
85 bacteria were washed twice in phosphate buffer saline and resuspended in 7H9 base media +  
86 0.05% tyloxapol + 0.085% NaCl containing either 5g/L or 50g/L of fatty acid free BSA (fraction V  
87 Roche) with no glycerol nor dextrose added. Media were supplemented with glycerol (20mM) or  
88 OA at various concentration from stocks at 1% (40 mM) or 3% (120mM) OA. pH adjustment of  
89 media was carried out by adding HCl or NaOH when appropriate. MES (2-(N-Morpholino)  
90 ethanesulfonic acid) hydrate was added to acidified media (pH $\leq$ 6.5) at 100 mM. In Fig. 1E, MIC90  
91 were calculated using the Gompertz equation. For survival experiments, bacteria were plated onto  
92 7H10 plates containing 4g/L of charcoal.

93

## 94 **Acknowledgments**

95

96 We thank Helena I. M. Boshoff for providing the *Mycobacterium tuberculosis* H37Rv  $\Delta pncA$  mutant  
97 strain and its wild-type counterpart. This work was supported by the NIH Grant No. P01AI143575.

98

99

## 100 **References**

101

102

- 103 [1] C. Lange, K. Dheda, D. Chesov, A. M. Mandalakas, Z. Udwadia, and C. R. Horsburgh,  
104 "Management of drug-resistant tuberculosis," *Lancet*, vol. 394, no. 10202, pp. 953–966,  
105 2019.
- 106 [2] D. E. Snider, "A controlled trial of six months chemotherapy in pulmonary tuberculosis,"  
107 *Am. Rev. Respir. Dis.*, vol. 127, no. 2, pp. 254–255, 1983.
- 108 [3] M. Zignol *et al.*, "Population-based resistance of *Mycobacterium tuberculosis* isolates to  
109 pyrazinamide and fluoroquinolones: results from a multicountry surveillance project,"  
110 *Lancet Infect. Dis.*, vol. 16, no. 10, pp. 1185–1192, 2016.
- 111 [4] P. Miotto *et al.*, "Mycobacterium tuberculosis pyrazinamide resistance determinants: A  
112 multicenter study," *MBio*, vol. 5, no. 5, pp. 1–10, 2014.
- 113 [5] E. A. Lamont, N. A. Dillon, and A. D. Baughn, "The Bewildering Antitubercular Action of  
114 Pyrazinamide," *Microbiol. Mol. Biol. Rev.*, vol. 84, no. 2, pp. 1–15, 2020.
- 115 [6] "Prediction of Susceptibility to First-Line Tuberculosis Drugs by DNA Sequencing," *N.*  
116 *Engl. J. Med.*, vol. 379, no. 15, pp. 1403–1415, 2018.
- 117 [7] S. Mok *et al.*, "Overcoming the challenges of pyrazinamide susceptibility testing in clinical  
118 mycobacterium tuberculosis isolates," *Antimicrob. Agents Chemother.*, vol. 65, no. 8, pp.  
119 1–8, 2021.
- 120 [8] A. Gouzy, C. Healy, K. A. Black, K. Y. Rhee, and S. Ehrh, "Growth of *Mycobacterium*  
121 tuberculosis at acidic pH depends on lipid assimilation and is accompanied by reduced  
122 GAPDH activity," *Proc. Natl. Acad. Sci. U. S. A.*, vol. 118, no. 32, pp. 1–9, 2021.
- 123 [9] F. Sun *et al.*, "Introducing molecular testing of pyrazinamide susceptibility improves  
124 multidrug-resistant tuberculosis treatment outcomes: A prospective cohort study," *Eur.*

- 125            *Respir. J.*, vol. 53, no. 3, 2019.
- 126 [10] BERNARD D. DAVIS AND RENE J. DUBOS, "THE BINDING OF FATTY ACIDS BY  
127 SERUM ALBUMIN, A PROTECTIVE GROWTH FACTOR IN BACTERIOLOGICAL  
128 MEDIA," *J. Exp. Med.*, no. 2, pp. 215–228, 1947.
- 129 [11] J. A. Hamilton and D. P. Cistola, "Transfer of oleic acid between albumin and phospholipid  
130 vesicles," *Proc. Natl. Acad. Sci. U. S. A.*, vol. 83, no. 1, pp. 82–86, 1986.
- 131 [12] McDermott Walsh Tompsett Ralph, "Activation of Pyrazinamide and Nicotinamide in Acidic  
132 Environments in Vitro," *Am. Rev. Tuberc.*, vol. 70, pp. 748–754.
- 133 [13] J. Werngren, E. Sturegård, P. Juréen, K. Ängeby, S. Hoffner, and T. Schönd,  
134 "Reevaluation of the critical concentration for drug susceptibility testing of *Mycobacterium*  
135 tuberculosis against pyrazinamide using wild-type MIC distributions and *pncA* gene  
136 sequencing," *Antimicrob. Agents Chemother.*, vol. 56, no. 3, pp. 1253–1257, 2012.
- 137 [14] P. Santucci, D. J. Greenwood, A. Fearn, K. Chen, H. Jiang, and M. G. Gutierrez,  
138 "Intracellular localisation of *Mycobacterium tuberculosis* affects efficacy of the antibiotic  
139 pyrazinamide," *Nat. Commun.*, vol. 12, no. 1, pp. 1–15, 2021.
- 140 [15] C. D. Tweed *et al.*, "Bedaquiline, moxifloxacin, pretomanid, and pyrazinamide during the  
141 first 8 weeks of treatment of patients with drug-susceptible or drug-resistant pulmonary  
142 tuberculosis: a multicentre, open-label, partially randomised, phase 2b trial," *Lancet*  
143 *Respir. Med.*, vol. 7, no. 12, pp. 1048–1058, 2019.

144

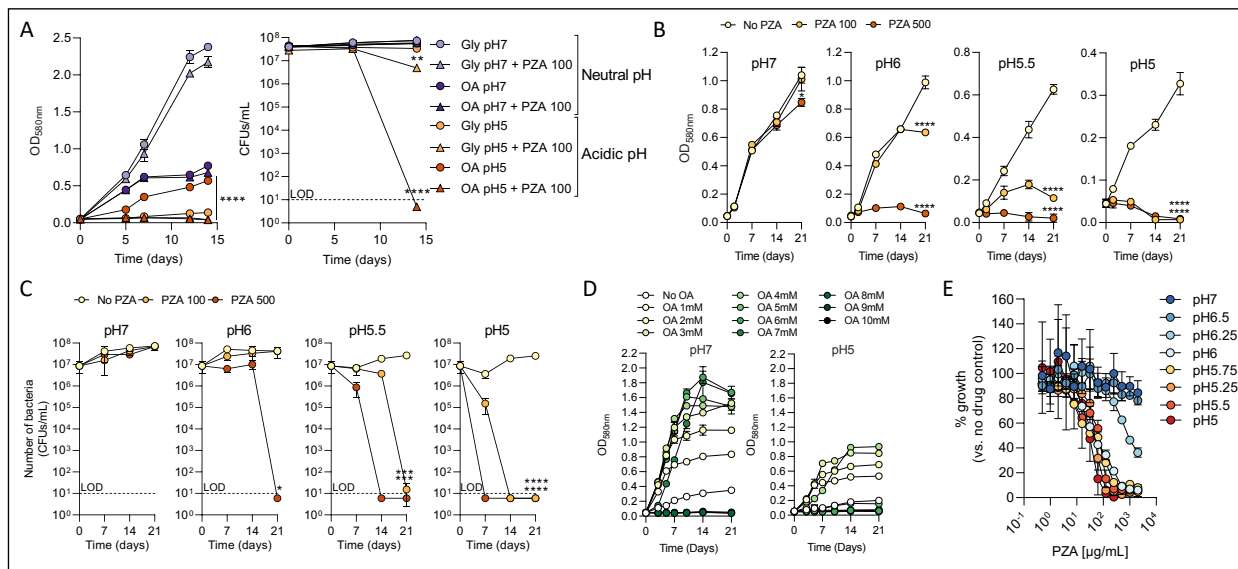

**Fig. 1.** Antitubercular activity of PZA in lipid-rich and acidic conditions. (A) Growth (left panel) and survival (right panel) of WT Mtb in 7H9 with Gly (20mM) or OA at either pH7 or pH5 and in the presence or not of PZA (100 µg/mL). Growth (B) and survival (C) of WT Mtb at various pH with OA and in the presence or not of PZA at 100 or 500 µg/mL. (D) Growth of Mtb at pH7 and pH5 in 7H9 containing BSA at 50g/L and various amount of OA. (E) Growth of Mtb at various pH and against various concentrations of PZA in 7H9 containing 3mM OA and 50g/L of BSA. Data were recorded after 10 days at 37°C. In A-C, 200µM OA was replenished ev. 2-3 days [8]. In A-C, statistical significance was determined for the final time points by comparing PZA-treated conditions with control samples not containing PZA using a one-way ANOVA and Tukey's multiple comparison test. Data in A-D are means ± SD of three independent experiments and data in E are means ± SD of an experiment performed in triplicate and representative of three independent experiments. LOD: Limit of detection. CFU: colony forming unit. \* $P < 0.05$ ; \*\* $P < 0.005$ ; \*\*\* $P < 0.0005$ ; \*\*\*\* $P < 0.0001$ .

145  
146  
147  
148  
149  
150  
151  
152  
153  
154  
155  
156  
157  
158  
159  
160  
161  
162  
163  
164  
165  
166

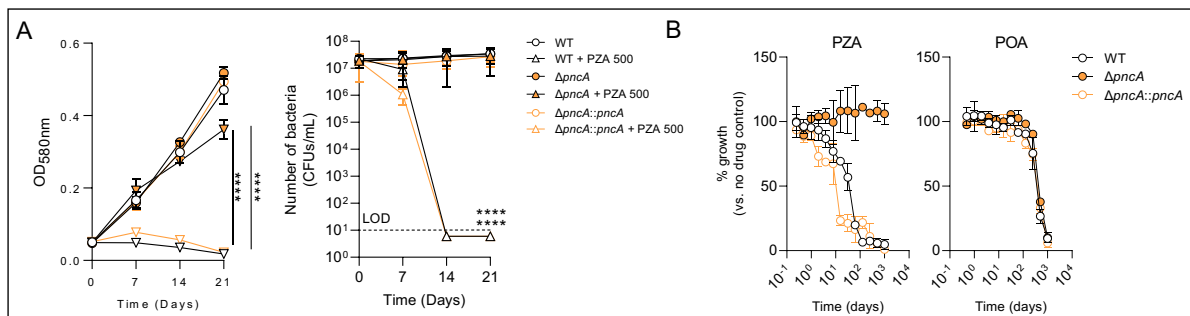

**Fig. 2.** Reliable detection of PZA resistance *in vitro*. (A) Growth (left panel) and survival (right panel) of wild-type (WT), *pncA* mutant ( $\Delta pncA$ ) and complemented strain ( $\Delta pncA::pncA$ ) at pH5 with OA in the presence or not of PZA at 500  $\mu$ g/mL. (B) Growth of WT,  $\Delta pncA$  and  $\Delta pncA::pncA$  strains at pH5.5 against various concentrations of PZA or POA in 7H9 containing 3mM OA and 50g/L of BSA. Data were recorded after 10 days at 37°C. In A, 200 $\mu$ M OA was replenished ev. 2-3 days [8]. In A, statistical significance was determined for the final time points and among PZA-treated conditions using a one-way ANOVA and Tukey's multiple comparison test. Data in A are means  $\pm$  SD of three independent experiments and data in B are means  $\pm$  SD of an experiment performed in triplicate and representative of three independent experiments performed in triplicates. LOD: Limit of detection. CFU: colony forming unit. \*\*\*\* $P$ < 0.0001.

167  
168  
169  
170  
171  
172  
173  
174  
175  
176  
177  
178  
179  
180  
181  
182  
183  
184  
185  
186  
187  
188  
189  
190  
191  
192  
193  
194  
195  
196
